# Supplementary material
Source: Springer Nature journal article supplement (https://www.springerprofessional.de/resource/supplementary/13677_2012_9_MOESM1_ESM.pdf/10743424)
Supplement: MOESM1 [file 10743424]

*Life Services Apps*

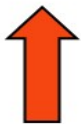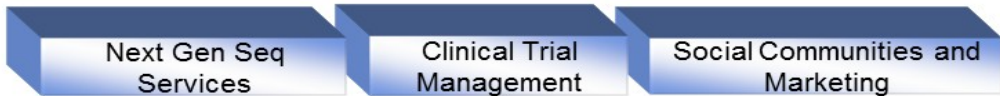

Next Gen Seq  
Services

Clinical Trial  
Management

Social Communities and  
Marketing

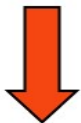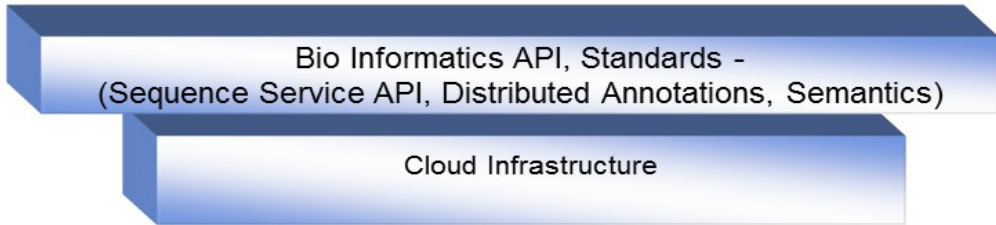

Bio Informatics API, Standards -  
(Sequence Service API, Distributed Annotations, Semantics)

Cloud Infrastructure

*LifeServices OS*
